# Supplementary material for: Physicians’ Use of Email With Patients: Factors Influencing Electronic Communication and Adherence to Best Practices
Source: J Med Internet Res. 2006 Mar 24;8(1):e2. doi: 10.2196/jmir.8.1.e2 (PMC1550692; doi:10.2196/jmir.8.1.e2)
Supplement: Supplementary file 1 [file jmir_v8i1e2_app1.pdf]

# Use of Information Technology in Physician Practices

---

**1. Do you have access to a computer at your current office practice?**

- ☐ **YES**                      ☐ **NO -- PLEASE SKIP TO QUESTION #2**

*If YES, please answer the following.*

**a. Do you have internet access at your current office practice?**

- ☐ **YES**    **What type of internet access do you have?** *(Please ✓ all that apply)*  
☐ Dial-up                      ☐ High Speed (i.e. cable or DSL)                      ☐ Wireless
- ☐ **NO**

**b. Do you routinely use the available computer?** *(at least once on ½ of all business days)*

- ☐ Yes                      ☐ No

**c. Do other, non-physician, staff at your office use the available computer?**

- ☐ Yes                      ☐ No

**d. Does the computer get used in the scope of your practice?**

- ☐ **YES**    **For what type of functions?** *(Please ✓ all that apply)*
- |                                                                      |                                                  |
|----------------------------------------------------------------------|--------------------------------------------------|
| <input type="checkbox"/> Scheduling of patients appointments         | <input type="checkbox"/> Patient registration    |
| <input type="checkbox"/> Billing/ charge capture                     | <input type="checkbox"/> Dictation               |
| <input type="checkbox"/> Drug references/Medication interactions     | <input type="checkbox"/> Lab results             |
| <input type="checkbox"/> Access to reference materials               | <input type="checkbox"/> Bills/claims submission |
| <input type="checkbox"/> Electronic prescribing of drugs             | <input type="checkbox"/> Weight based dosing     |
| <input type="checkbox"/> Electronic order entry (e.g., labs, x-rays) | <input type="checkbox"/> Patient records         |
| <input type="checkbox"/> Other: <i>(Please Specify)</i> _____        |                                                  |

- ☐ **NO**

---

**2. Do you currently own a personal digital assistant (PDA) (i.e., Palm Pilot or Pocket PC)?**

- ☐ **YES**                      ☐ **NO**

**3. Do you routinely use a PDA in your office practice?** *(at least once on ½ of all business days)*

- ☐ **YES**                      ☐ **NO**

**If Yes, for which of the following functions do you use your PDA?** *(Please ✓ all that apply)*

- |                                                                      |                                                  |
|----------------------------------------------------------------------|--------------------------------------------------|
| <input type="checkbox"/> Drug references                             | <input type="checkbox"/> Charge capture          |
| <input type="checkbox"/> Medication interactions                     | <input type="checkbox"/> Patient records         |
| <input type="checkbox"/> Access to reference materials               | <input type="checkbox"/> Lab results             |
| <input type="checkbox"/> Electronic Prescribing of medications       | <input type="checkbox"/> Bills/claims submission |
| <input type="checkbox"/> Electronic order entry (e.g., labs, x-rays) | <input type="checkbox"/> Weight based dosing     |
| <input type="checkbox"/> Calendar and other organizer functions      | <input type="checkbox"/> Dictation               |
| <input type="checkbox"/> Other: <i>(Please Specify)</i> _____        |                                                  |

---

4. Do you personally use email from your office practice to communicate with patients?

☐ YES ☐ NO -- PLEASE SKIP TO QUESTION #4C

*If YES, please answer the following:*

a. How often do you email patients?

☐ Often (at least once on ½ of all business days) ☐ Occasionally ☐ Rarely

b. Which of the following policies, if any, do you require for e-mail with your patients?

- ☐ Establish a turnaround time for messages
- ☐ Inform patients about privacy issues with respect to e-mail
- ☐ Print e-mail communications and place in patient's chart
- ☐ Establish types of transactions (i.e., prescription refill, appointment scheduling, etc.)
- ☐ Instruct patients to put category of transaction in subject line of message
- ☐ Request patients put their name or identification number in body of message
- ☐ Configure automatic reply to acknowledge receipt of patient's message
- ☐ Send a new message to inform patient of completion of request
- ☐ Request patients use auto-reply feature to acknowledge reading clinician's message
- ☐ Develop archival and retrieval mechanisms
- ☐ Explain to patients that their message should be concise
- ☐ Remind patients when they do not adhere to guidelines
- ☐ When e-mail messages become too lengthy, notify patients to come in to discuss or call them

c. **If you DON'T personally use email with patients:** *Please answer the following:*

Would you like to communicate with your patients by email in the future?

☐ Yes ☐ No ☐ Don't Know Yet

5. Other than patients, do you use email from your practice with any other groups?

☐ YES ☐ NO

**If YES, which of the following groups do you use email with?** *(Please ✓ all that apply)*

- ☐ Family member or caregiver of patients
- ☐ Other doctors
- ☐ Business related communications (e.g., with insurers, pharmacies, etc.)
- ☐ Hospitals
- ☐ Pharmaceutical companies
- ☐ My personal friends or family members
- ☐ Other (please specify): \_\_\_\_\_

---

6. Does your current office practice use a Registry or Disease Management software system?

☐ YES ☐ NO

If YES, which of the following chronic diseases are followed? (Please ✓ all that apply)

- ☐ Diabetes
- ☐ Coronary Artery Disease
- ☐ Hypertension
- ☐ Heart Failure
- ☐ Preventive Care
- ☐ Other: (Please Specify): \_\_\_\_\_

---

7. Does your current office practice have an Internet website available to patients?

☐ YES ☐ NO If NO, do you plan to get a website? (Please ✓ one)

- ☐ YES, very soon (within 1 year)
- ☐ YES, but not within the next year
- ☐ NO

---

8. Does your current office practice use electronic health records (EHR)?

EHR is defined as a paperless form of the medical record that requires the provider to enter patient information (i.e., clinical notes) into a computer system instead of doing so on paper.

☐ YES

If yes, what YEAR best describes when you began using EHR in your practice \_\_\_\_\_  
(please indicate year)

If yes, please specify the vendor of your EHR system: \_\_\_\_\_

☐ NO Please answer the following: Are you considering getting EHR? (Please ✓ one)

- ☐ Yes, very soon (within 1 year)
- ☐ Yes, but not within the next year
- ☐ No, I am not considering getting EHR at this time

9. Do you personally routinely use Electronic Health records (EHR) in your office practice?

☐ YES ☐ NO

If YES, Which of the following functions does your EHR include? (Please ✓ all that apply)

- |                                                                        |                                                               |
|------------------------------------------------------------------------|---------------------------------------------------------------|
| <input type="checkbox"/> Problem list                                  | <input type="checkbox"/> Patient scheduling                   |
| <input type="checkbox"/> Procedures                                    | <input type="checkbox"/> Weight-based dosing calculations     |
| <input type="checkbox"/> Diagnoses                                     | <input type="checkbox"/> Growth charting                      |
| <input type="checkbox"/> Medication list                               | <input type="checkbox"/> Clinical decision support            |
| <input type="checkbox"/> Allergies                                     | <input type="checkbox"/> Patient education materials          |
| <input type="checkbox"/> Patient demographics (i.e., age, DOB, etc.)   | <input type="checkbox"/> Coding advice to physicians          |
| <input type="checkbox"/> Clinical notes                                | <input type="checkbox"/> Advance directives                   |
| <input type="checkbox"/> Electronic prescribing of medications         | <input type="checkbox"/> Access to reference material         |
| <input type="checkbox"/> Electronic order entry (i.e., labs or x-rays) | <input type="checkbox"/> Preventive service reminders         |
| <input type="checkbox"/> Electronically available lab data/ results    | <input type="checkbox"/> Auto-updated insurance coverage info |
| <input type="checkbox"/> Electronically available x-ray results        | <input type="checkbox"/> Offsite access/ log-in capability    |
| <input type="checkbox"/> Electronic connection to pharmacy info        | <input type="checkbox"/> Other (Specify): _____               |

10. Please indicate how each potential barrier affects your decision to continue (or expand) using EHR. If you do not currently use EHR, please respond by indicating how much each barrier contributes to why you don't currently use EHR in your office practice.

|                                                                                                   | POTENTIAL BARRIERS       |                          |                          |                          |
|---------------------------------------------------------------------------------------------------|--------------------------|--------------------------|--------------------------|--------------------------|
|                                                                                                   | Major Barrier            | Minor Barrier            | Not a Barrier            | Not Applicable           |
| <b><u>Productivity</u></b>                                                                        |                          |                          |                          |                          |
| • Lack of time to acquire, implement such a system                                                | <input type="checkbox"/> | <input type="checkbox"/> | <input type="checkbox"/> | <input type="checkbox"/> |
| • Entering data into computer can be cumbersome                                                   | <input type="checkbox"/> | <input type="checkbox"/> | <input type="checkbox"/> | <input type="checkbox"/> |
| • No time to learn how to use such a system                                                       | <input type="checkbox"/> | <input type="checkbox"/> | <input type="checkbox"/> | <input type="checkbox"/> |
| • The system would be difficult to use                                                            | <input type="checkbox"/> | <input type="checkbox"/> | <input type="checkbox"/> | <input type="checkbox"/> |
| • EHR may slow me down                                                                            | <input type="checkbox"/> | <input type="checkbox"/> | <input type="checkbox"/> | <input type="checkbox"/> |
| • Disrupts workflow and/or office's physical layout to accommodate going to a computerized system | <input type="checkbox"/> | <input type="checkbox"/> | <input type="checkbox"/> | <input type="checkbox"/> |
| • Temporary loss of productivity and/or revenue during EHR system implementation phase            | <input type="checkbox"/> | <input type="checkbox"/> | <input type="checkbox"/> | <input type="checkbox"/> |
| <b><u>Financial</u></b>                                                                           |                          |                          |                          |                          |
| • Inadequate Return on Investment (ROI)                                                           | <input type="checkbox"/> | <input type="checkbox"/> | <input type="checkbox"/> | <input type="checkbox"/> |
| • Upfront cost of hardware/software are too high                                                  | <input type="checkbox"/> | <input type="checkbox"/> | <input type="checkbox"/> | <input type="checkbox"/> |
| • Ongoing maintenance costs would be too high                                                     | <input type="checkbox"/> | <input type="checkbox"/> | <input type="checkbox"/> | <input type="checkbox"/> |
| <b><u>Technical</u></b>                                                                           |                          |                          |                          |                          |
| • Lack of uniform data standards within the industry                                              | <input type="checkbox"/> | <input type="checkbox"/> | <input type="checkbox"/> | <input type="checkbox"/> |
| • Products available do not meet my needs                                                         | <input type="checkbox"/> | <input type="checkbox"/> | <input type="checkbox"/> | <input type="checkbox"/> |
| • Me and/or my staff don't have any technical knowledge                                           | <input type="checkbox"/> | <input type="checkbox"/> | <input type="checkbox"/> | <input type="checkbox"/> |
| • Temporary loss of access to patient records if computer crashes or power fails                  | <input type="checkbox"/> | <input type="checkbox"/> | <input type="checkbox"/> | <input type="checkbox"/> |
| <b><u>Patients</u></b>                                                                            |                          |                          |                          |                          |
| • Privacy/confidentiality concerns (i.e., electronic records not secure)                          | <input type="checkbox"/> | <input type="checkbox"/> | <input type="checkbox"/> | <input type="checkbox"/> |
| • Patient resistance or not wanting their physicians to use EHR                                   | <input type="checkbox"/> | <input type="checkbox"/> | <input type="checkbox"/> | <input type="checkbox"/> |

11. How satisfied are you with the level of computerization in your current office practice?

☐ Very Satisfied
 ☐ Somewhat Satisfied
 ☐ Neutral
 ☐ Somewhat Dissatisfied
 ☐ Very Dissatisfied

12. Overall, how sophisticated of a computer user do you consider yourself?

☐ Very Sophisticated
 ☐ Sophisticated
 ☐ Neutral
 ☐ Unsophisticated
 ☐ Very Unsophisticated

13. Overall, how satisfied are you with your current medical practice?

☐ Very Satisfied
 ☐ Somewhat Satisfied
 ☐ Neutral
 ☐ Somewhat Dissatisfied
 ☐ Very Dissatisfied

## DEMOGRAPHIC INFORMATION

14. Which of the following best describes the area in which you currently spend the majority of your practice time? (Please select only **one** choice)

- |                                            |                                                             |
|--------------------------------------------|-------------------------------------------------------------|
| <input type="checkbox"/> Family Medicine   | <input type="checkbox"/> General Surgery                    |
| <input type="checkbox"/> Internal Medicine | <input type="checkbox"/> Surgical Specialty (Specify) _____ |
| <input type="checkbox"/> Pediatrics        | <input type="checkbox"/> Medical Specialty (Specify) _____  |
| <input type="checkbox"/> OB/GYN            | <input type="checkbox"/> Other (Specify) _____              |

15. Estimate the percent of your practice that is made up of patients in the following age groups:

|             |         |                   |         |
|-------------|---------|-------------------|---------|
| 0-18 years  | _____ % | 45-64 years       | _____ % |
| 19-44 years | _____ % | 65 years and over | _____ % |

16. Approximately what percentage of your patients have the following insurance coverage?

|          |         |                       |         |
|----------|---------|-----------------------|---------|
| Medicare | _____ % | Private insurance     | _____ % |
| Medicaid | _____ % | Self-pay or uninsured | _____ % |

17. How many physicians, including yourself, work at the practice location where you spend the majority of your time?

\_\_\_\_\_ # of physicians

18. Which single setting best describes where the majority of your time is spent?

- |                                                                                   |                                                                     |
|-----------------------------------------------------------------------------------|---------------------------------------------------------------------|
| <input type="checkbox"/> Single specialty practice                                | <input type="checkbox"/> Group or staff model HMO                   |
| <input type="checkbox"/> Multi specialty practice                                 | <input type="checkbox"/> Academic health center/ university setting |
| <input type="checkbox"/> Hospital or Emerg. Dept. (hospital employee)             | <input type="checkbox"/> Community health center                    |
| <input type="checkbox"/> Hospital-owned office-based practice (hospital employee) | <input type="checkbox"/> County health department                   |
|                                                                                   | <input type="checkbox"/> Other (Specify) _____                      |

19. How long have you practiced . . .

In your current community? \_\_\_\_\_ YEARS

Total years in practice (since medical school graduation) \_\_\_\_\_ YEARS

20. Race/Ethnicity:
- |                                                                 |
|-----------------------------------------------------------------|
| <input type="checkbox"/> White non-Hispanic                     |
| <input type="checkbox"/> African-American or Black non-Hispanic |
| <input type="checkbox"/> Hispanic                               |
| <input type="checkbox"/> Asian                                  |
| <input type="checkbox"/> Other                                  |

Gender: ☐ Male  
☐ Female

Age: \_\_\_\_\_ (years)

21. If you are willing to participate in follow-up research related to this survey, please mark the following box: ☐ (Your responses will always be kept confidential)

☐ Yes, I would like to receive a summary of the findings. Email: \_\_\_\_\_

**Thank you for your help!!!**

Please return survey in the pre-addressed, postage-paid envelope to:  
FSU Survey Research Laboratory Tallahassee, Florida 32306-2221
